# Supplementary material for: Robust Biofilm-Forming Bacillus Isolates from the Dairy Environment Demonstrate an Enhanced Resistance to Cleaning-in-Place Procedures
Source: MDPI journal article supplement (doi:10.3390/foods8040134), 2019-04-20
Supplement: s1 [file s1]

**Table S1.** Relative quantity of the matrix, surrounding biofilm-derived spores of the dairy-associated *Bacillus* isolates and *B. subtilis* 3610.

| Strain                            | Relative fluorescence intensity<br>(proteinaceous components of biofilm matrix) |
|-----------------------------------|---------------------------------------------------------------------------------|
| <i>B. subtilis</i> 3610           | 8 ± 2                                                                           |
| <i>B. paralicheniformis</i> S127  | 100 ± 9                                                                         |
| <i>B. licheniformis</i> MS310     | 89 ± 9                                                                          |
| <i>B. subtilis</i> MS302          | 73 ± 5                                                                          |
| <i>B. paralicheniformis</i> MS303 | 80 ± 13                                                                         |

The relative fluorescence intensity values are based on the data obtained using CLSM. The Image J program was used to analyze the relative quantities of extracellular matrix surrounding the biofilm cells/spores.

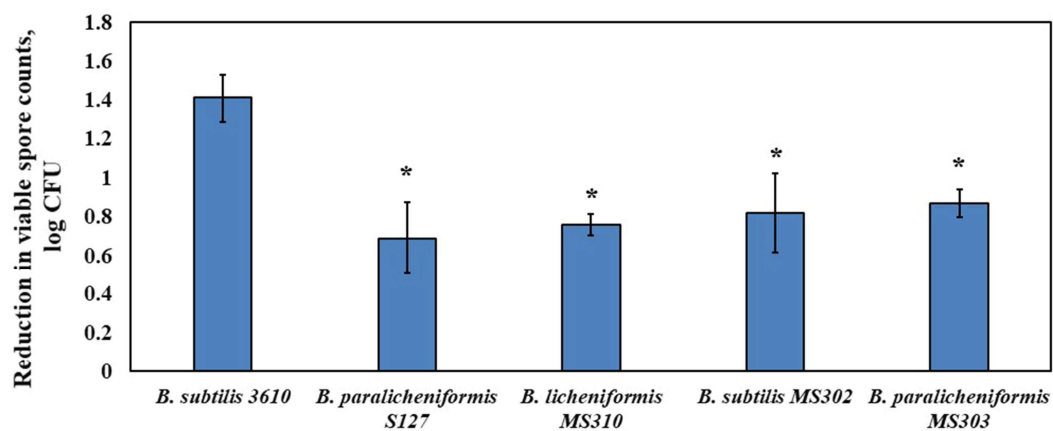

**Figure S1.** Effect of the cleaning procedure with tap water on removal of the biofilm-derived spores of the dairy-associated *Bacillus* in the simplified laboratory system. \* – statistically significant difference ( $p < 0.05$ ) between the reduction in the viable spore counts in a given sample and the reduction in the spore counts for *B. subtilis* 3610 (control).

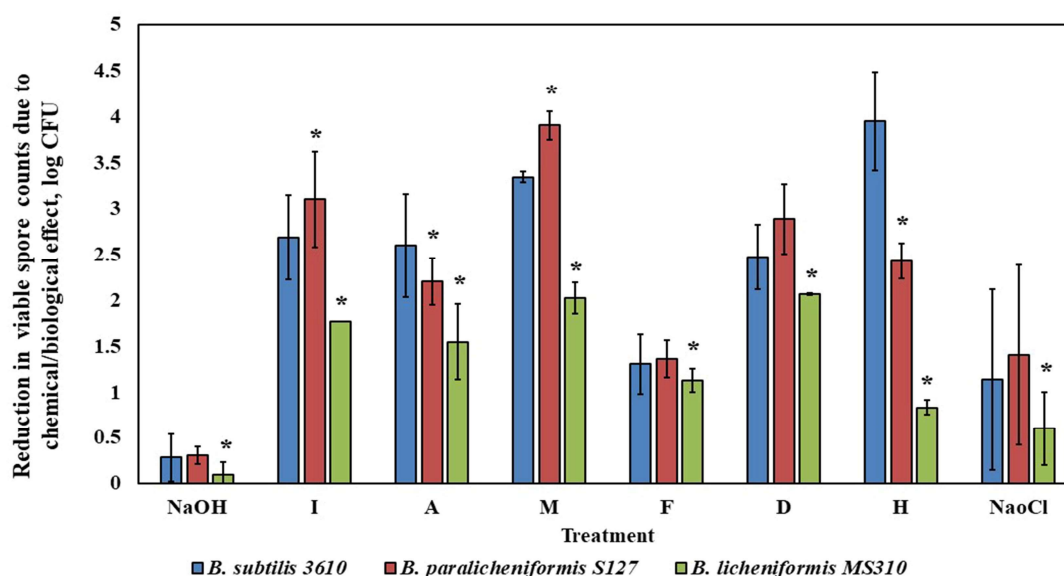

**Figure S2.** Chemo-biological effect of the commercial cleaning agents on removal of the biofilm derived spores in the laboratory CIP system. \* – Statistically significant difference ( $P < 0.05$ ) between

the reduction in the viable spore counts in a given sample and the reduction in the spore counts for *B. subtilis* 3610 (control).

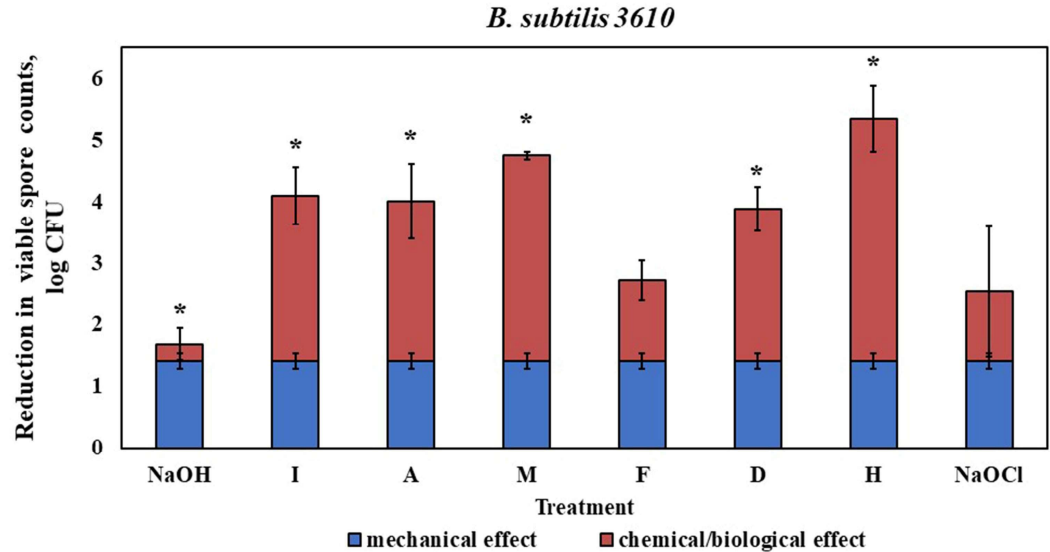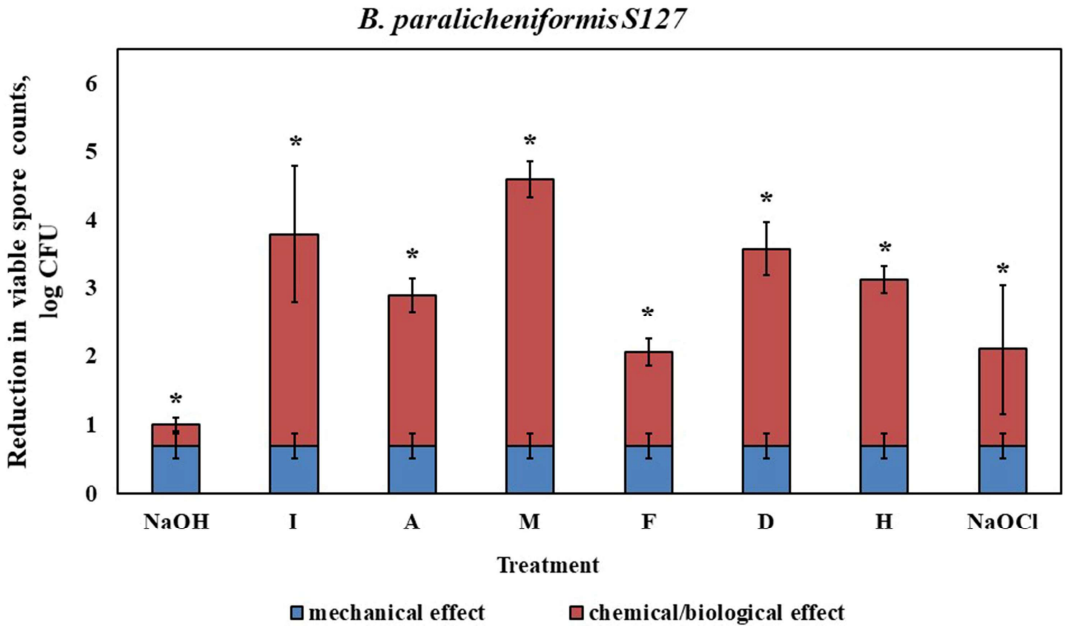

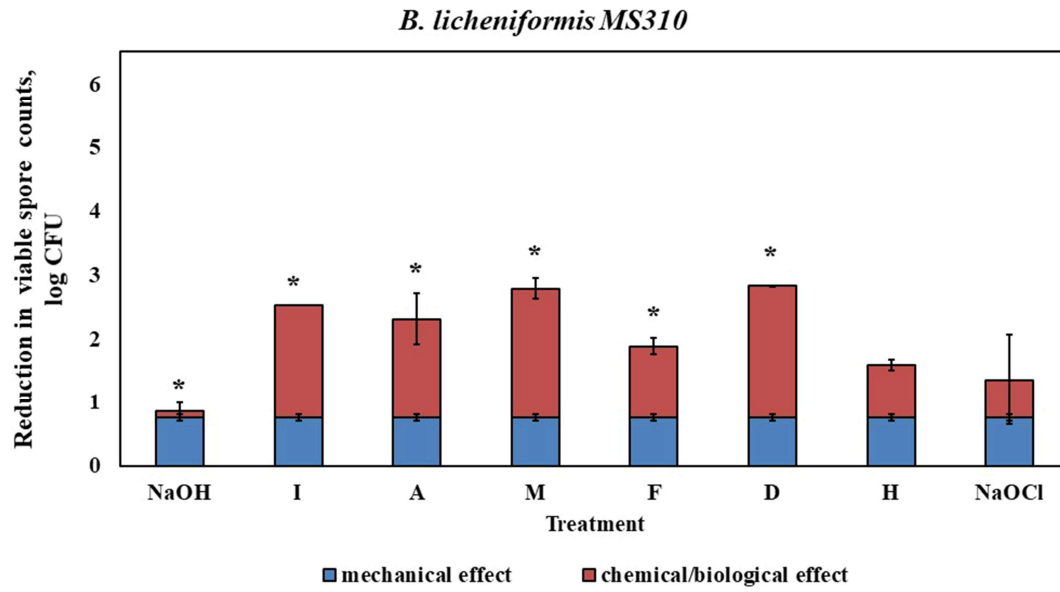

**Figure S3.** Correlation between mechanical and chemo-biological effect of the examined agents in relation to the removal of the biofilm derived spores in the laboratory CIP system. \* – Statistically significant difference ( $p < 0.05$ ) between the reduction in the viable spore counts due to the mechanical effect of liquid circulation and the reduction in the spore counts due to the chemo-biological effect of the examined agents.
